# Supplementary material for: Herbicidal Effects and Cellular Targets of Aqueous Extracts from Young <em>Eucalyptus globulus </em>Leaves - A Novel Post-Fire Management Strategy of Eucalyptus Stands
Source: Preprints.org preprint supplement (doi:10.20944/preprints202103.0047.v3), 2021-03-22
Supplement: Supplementary file 1 [file supplementary]

Supplementary Materials

Herbicidal effects and cellular targets of aqueous extracts prepared with young *Eucalyptus globulus* leaves - a novel post-fire management strategy of eucalyptus stands

Mafalda Pinto1*, Cristiano Soares1, Maria Martins1, Bruno Sousa1, Inês Valente2,3, Ruth Pereira1, Fernanda Fidalgo1

1 GreenUPorto - Sustainable Agrifood Production Research Centre, Departamento de Biologia, Faculdade de Ciências, Universidade do Porto, Rua do Campo Alegre, 4169-007, Porto, Portugal

2 REQUIMTE, LAQV, Departamento de Química e Bioquímica, Faculdade de Ciências, Universidade do Porto, Rua do Campo Alegre, 4169-007, Porto, Portugal

3 REQUIMTE, LAQV, ICBAS, Instituto de Ciências Biomédicas Abel Salazar, Universidade do Porto, Rua Jorge Viterbo Ferreira, 228, 4050-313, Porto, Portugal

* Correspondence: up201506457@fc.up.pt

**Table S1.** Summary of repeated measures’ ANOVA statistical data for the percentage of viable plants (% viable plants) treated with the extracts prepared with fresh leaves (FLE) and with dried leaves (DLE).

|  | **Parameter** | **Time (weeks)** | **Time x Concentration** |
| --- | --- | --- | --- |
| FLE | % viable plants | F (1.81, 34.4) = 29.2; *p* ≤ 0.001 | F (10.9, 34.4) = 14.9; *p* ≤ 0.001 |
| DLE | % viable plants | F (2.48, 49.7) = 44.7; *p* ≤ 0.001 | F (14.9, 49.7) = 20.8; *p* ≤ 0.001 |

**Table S2.** Summary of one-way ANOVA statistical data for the percentage of viable plants (% viable plants) for each tested concentration of the extracts prepared with fresh leaves (FLE) and with dried leaves (DLE), as well as glyphosate (GLY), over the exposure period (5 weeks).

| **Situation** | **Concentration [% (v/v)]** | **% viable plants** |
| --- | --- | --- |
| FLE | 0% | - |
| 12.5% | F (5, 17) = 0.700; *p* > 0.05 |
| 25% | - |
| 50% | F (5, 17) = 0.542; *p* > 0.05 |
| 75% | F (5, 17) = 2.47; *p* > 0.05 |
| 100% | F (5, 17) = 1.76; *p* > 0.05 |
| DLE | 0% | - |
| 12.5% | - |
| 25% | F (5, 18) = 0.600; *p* > 0.05 |
| 50% | F (5, 18) = 0.600; *p* > 0.05 |
| 75% | - |
| 100% | F (5, 18) = 26.9; *p* ≤ 0.001 |
| GLY | - | F (5, 17) = 14.2; *p* ≤ 0.001 |

**Table S3** – Summary of ANOVA statistical data for purslane plants treated with increasing concentrations of the extracts prepared with fresh leaves (FLE) and with dried leaves (DLE).

| **Parameter** | **FLE** | **DLE** |
| --- | --- | --- |
| % viable plants | F (6, 20) = 78.1; *p* ≤ 0.001 | F (6, 21) = 101; *p* ≤ 0.001 |
| Shoot length | F (6, 17) = 160; *p* ≤ 0.001 | F (6, 17) = 47.5; *p* ≤ 0.001 |
| Shoot biomass | F (6, 16) = 74.4; *p* ≤ 0.001 | F (6, 18) = 64.8; *p* ≤ 0.001 |
| Root length | F (6, 20) = 88.2; *p* ≤ 0.001 | F (6, 17) = 60.5; *p* ≤ 0.001 |
| Root biomass | F (6, 16) = 33.2; *p* ≤ 0.001 | F (6, 17) = 23.5; *p* ≤ 0.001 |

**Table S4 -** Summary of ANOVA statistical data obtained for the shoots and roots of purslane plants treated with the extract prepared with dried leaves (DLE) at 75% (v/v) and 100% (v/v).

| **Parameter** | **Shoots** | **Roots** |
| --- | --- | --- |
| H2O2 | F (2, 9) = 24.5; *p* ≤ 0.001 | F (2, 7) = 116; *p* ≤ 0.001 |
| MDA | F (2, 8) = 2.58; *p* > 0.05 | F (2, 6) = 15.8; *p* ≤ 0.05 |
| Total sugars | F (2, 7) = 22.8; *p* ≤ 0.001 | F (2, 7) = 16.9; *p* ≤ 0.05 |
| Free amino acids | F (2, 6) = 34.6; *p* ≤ 0.001 | F (2, 6) = 11.4; *p* ≤ 0.05 |
| Proline | F (2, 7) = 4.42; *p* > 0.05 | - |
| Proteins | F (2, 9) = 28.2; *p* ≤ 0.001 | F (2, 13) = 12.6; *p* ≤ 0.001 |
| Total chlorophylls | F (2, 6) = 8.10; *p* ≤ 0.05 | - |
| Carotenoids | F (2, 6) = 13.1; *p* ≤ 0.05 | - |
| GS | F (2, 8) = 1.53; *p* > 0.05 | F (2, 6) = 27.9; *p* ≤ 0.001 |
| NR | F (2, 6) = 65.5; *p* ≤ 0.001 | F (2, 6) = 1.33; *p* > 0.05 |
